# Supplementary material for: Interdependence between confirmed and discarded cases of dengue, chikungunya and Zika viruses in Brazil: A multivariate time-series analysis
Source: PubMed Central journal article supplement (PMC6996800; doi:10.1371/journal.pone.0228347), 2020-02-03
Supplement: pone.0228347.s001.pdf [file pone.0228347.s001.pdf]

Table 1: Results of Dickey-Fuller Test applied to the series of confirmed and discarded cases of dengue, chikungunya and Zika before and after differentiation. Brazil, January 2015 to December 2017.

|                             | $Z_{1t}$ | $Z_{2t}$ | $C_{1t}$ | $C_{2t}$ | $D_{2t}$ | $D_{2t}$ | $DZ_{1t}$ | $DZ_{2t}$ | $DC_{1t}$ | $DC_{2t}$ | $DD_{2t}$ | $DD_{2t}$ |
|-----------------------------|----------|----------|----------|----------|----------|----------|-----------|-----------|-----------|-----------|-----------|-----------|
| Test Statistic              | -2.25    | -2.33    | -2.36    | -1.90    | -4.29    | -2.60    | -3.68     | -4.50     | -4.92     | -6.89     | -5.34     | -5.58     |
| p-value                     | 0.19     | 0.16     | 0.15     | 0.33     | <0.001   | 0.09     | 0.004     | <0.001    | <0.001    | <0.001    | <0.001    | <0.001    |
| #Lags Used                  | 12       | 8        | 6        | 2        | 6        | 10       | 11        | 7         | 5         | 1         | 10        | 9         |
| Number of Observations Used | 143      | 147      | 149      | 153      | 149      | 145      | 143       | 147       | 149       | 153       | 144       | 145       |
