# Supplementary material for: Interdependence between confirmed and discarded cases of dengue, chikungunya and Zika viruses in Brazil: A multivariate time-series analysis
Source: PubMed Central journal article supplement (PMC6996800; doi:10.1371/journal.pone.0228347), 2020-02-03
Supplement: pone.0228347.s002.pdf [file pone.0228347.s002.pdf]

Table 1: AIC and Lag values for the restricts and unrestricted models for the series confirmed and discarded cases of dengue, chikungunya and Zika. Brazil, January 2015 to December 2017.

|            | Unrestricted model | Restricted model without Zika series | Restricted model without chikungunya series | Restricted model without Dengue series |
|------------|--------------------|--------------------------------------|---------------------------------------------|----------------------------------------|
| AIC values | 69.44              | 52.06                                | 48.50                                       | 41.67                                  |
| #Lags      | 13                 | 12                                   | 13                                          | 12                                     |
