# Supplementary material for: Interdependence between confirmed and discarded cases of dengue, chikungunya and Zika viruses in Brazil: A multivariate time-series analysis
Source: PubMed Central journal article supplement (PMC6996800; doi:10.1371/journal.pone.0228347), 2020-02-03
Supplement: pone.0228347.s003.pdf [file pone.0228347.s003.pdf]

**Table 1. Results of pairwise Granger tests for restricted models.** Exploratory search of associations between series of confirmed and discarded cases of dengue, chikungunya and Zika. Brazil, January 2015 to December 2017.

| Restricted model<br>without Zika series                                |                |         |               |
|------------------------------------------------------------------------|----------------|---------|---------------|
| Null hypothesis                                                        | Test statistic | p-value | Result        |
| Discarded cases of chikungunya do not affect confirmed cases of dengue | 2.284          | 0.008   | Reject        |
| Confirmed cases of dengue do not affect confirmed cases of chikungunya | 0.7111         | 0.74    | Do not reject |
| Confirmed cases of chikungunya do not affect confirmed cases of dengue | 1.300          | 0.216   | Do not reject |
| Confirmed cases of dengue do not affect discarded cases of chikungunya | 0.9936         | 0.454   | Do not reject |
| Discarded cases of dengue do not affect confirmed cases of chikungunya | 0.7065         | 0.745   | Do not reject |
| Confirmed cases of chikungunya do not affect discarded cases of dengue | 1.417          | 0.155   | Do not reject |
| Restricted model<br>without dengue series                              |                |         |               |
| Confirmed cases of Zika do not affect discarded cases of chikungunya   | 2.206          | 0.011   | Reject        |
| Discarded cases of Zika do not affect confirmed cases of chikungunya   | 2.447          | 0.004   | Reject        |
| Confirmed cases of Zika do not affect confirmed chikungunya            | 1.761          | 0.053   | Do not reject |
| Confirmed cases of chikungunya do not affect confirmed cases of Zika   | 0.7291         | 0.723   | Do not reject |
| Discarded cases of chikungunya do not affect confirmed cases of Zika   | 1.016          | 0.433   | Do not reject |
| Discarded cases of Zika do not affect confirmed cases of chikungunya   | 0.8772         | 0.571   | Do not reject |
| Restricted model<br>without chikungunya series                         |                |         |               |
| Confirmed cases of Zika do not affect discarded cases of dengue        | 4.377          | < 0.001 | Reject        |
| Discarded cases of dengue do not affect confirmed cases of Zika        | 5.227          | < 0.001 | Reject        |
| Confirmed cases of dengue do not affect discarded cases of Zika        | 5.479          | < 0.001 | Reject        |
| Confirmed cases of Zika do not affect confirmed cases of dengue        | 6.442          | < 0.001 | Reject        |
| Confirmed cases of dengue do not affect confirmed cases of Zika        | 5.227          | < 0.001 | Reject        |
| Discarded cases of Zika do not affect confirmed cases of dengue        | 4.690          | < 0.001 | Reject        |
