# Supplementary material for: Interdependence between confirmed and discarded cases of dengue, chikungunya and Zika viruses in Brazil: A multivariate time-series analysis
Source: PubMed Central journal article supplement (PMC6996800; doi:10.1371/journal.pone.0228347), 2020-02-03
Supplement: pone.0228347.s008.pdf [file pone.0228347.s008.pdf]

Summary of Regression Results

```

=====
Model:                VAR
Method:               OLS
Date:                Thu, 26, Dec, 2019
Time:                12:48:20

```

```

-----
No. of Equations:    6.00000    BIC:                79.3113
Nobs:                142.000    HQIC:              73.4541
Log likelihood:      -5665.51    FPE:                3.39136e+30
AIC:                 69.4447    Det(Omega_mle):    2.38644e+29
-----

```

Results for equation cases\_zika

```

=====

```

|                     | coefficient | std. error | t-stat | prob  |
|---------------------|-------------|------------|--------|-------|
| const               | 11.094524   | 28.124098  | 0.394  | 0.693 |
| L1.cases_zika       | 0.897923    | 0.168115   | 5.341  | 0.000 |
| L1.cases_des_zika   | 1.533060    | 0.730488   | 2.099  | 0.036 |
| L1.cases_chik       | 0.048381    | 0.149485   | 0.324  | 0.746 |
| L1.cases_des_chik   | -0.298380   | 0.406153   | -0.735 | 0.463 |
| L1.cases_dengue     | -0.046167   | 0.021204   | -2.177 | 0.029 |
| L1.cases_dengue_des | -0.158328   | 0.049182   | -3.219 | 0.001 |
| L2.cases_zika       | -0.690075   | 0.203275   | -3.395 | 0.001 |
| L2.cases_des_zika   | 0.943165    | 0.792161   | 1.191  | 0.234 |
| L2.cases_chik       | 0.020578    | 0.137753   | 0.149  | 0.881 |
| L2.cases_des_chik   | 0.017230    | 0.411329   | 0.042  | 0.967 |
| L2.cases_dengue     | 0.136659    | 0.025724   | 5.312  | 0.000 |
| L2.cases_dengue_des | -0.084641   | 0.057561   | -1.470 | 0.141 |
| L3.cases_zika       | -0.211701   | 0.228697   | -0.926 | 0.355 |
| L3.cases_des_zika   | -0.213419   | 0.762746   | -0.280 | 0.780 |
| L3.cases_chik       | -0.153490   | 0.160796   | -0.955 | 0.340 |
| L3.cases_des_chik   | 0.854566    | 0.443824   | 1.925  | 0.054 |
| L3.cases_dengue     | -0.018555   | 0.031249   | -0.594 | 0.553 |
| L3.cases_dengue_des | 0.085785    | 0.062131   | 1.381  | 0.167 |
| L4.cases_zika       | 0.036012    | 0.234096   | 0.154  | 0.878 |
| L4.cases_des_zika   | 0.413401    | 0.868047   | 0.476  | 0.634 |
| L4.cases_chik       | -0.172107   | 0.152852   | -1.126 | 0.260 |
| L4.cases_des_chik   | -0.413619   | 0.462932   | -0.893 | 0.372 |
| L4.cases_dengue     | -0.015609   | 0.028930   | -0.540 | 0.589 |
| L4.cases_dengue_des | 0.071332    | 0.061799   | 1.154  | 0.248 |
| L5.cases_zika       | 0.201610    | 0.209063   | 0.964  | 0.335 |
| L5.cases_des_zika   | 0.165454    | 0.822154   | 0.201  | 0.841 |
| L5.cases_chik       | 0.072781    | 0.154958   | 0.470  | 0.639 |
| L5.cases_des_chik   | -0.189762   | 0.459919   | -0.413 | 0.680 |
| L5.cases_dengue     | 0.015424    | 0.029177   | 0.529  | 0.597 |
| L5.cases_dengue_des | 0.002881    | 0.052582   | 0.055  | 0.956 |
| L6.cases_zika       | -0.123935   | 0.227611   | -0.545 | 0.586 |
| L6.cases_des_zika   | -1.456457   | 0.888872   | -1.639 | 0.101 |
| L6.cases_chik       | 0.091341    | 0.161122   | 0.567  | 0.571 |
| L6.cases_des_chik   | -0.271269   | 0.449494   | -0.603 | 0.546 |
| L6.cases_dengue     | 0.050604    | 0.024518   | 2.064  | 0.039 |
| L6.cases_dengue_des | 0.168810    | 0.046286   | 3.647  | 0.000 |

```

=====

```

|                      |           |          |        |       |
|----------------------|-----------|----------|--------|-------|
| L7.cases_zika        | -0.417545 | 0.213913 | -1.952 | 0.051 |
| L7.cases_des_zika    | 1.985676  | 0.834852 | 2.378  | 0.017 |
| L7.cases_chik        | -0.091553 | 0.169917 | -0.539 | 0.590 |
| L7.cases_des_chik    | -0.339353 | 0.449194 | -0.755 | 0.450 |
| L7.cases_dengue      | -0.168528 | 0.026585 | -6.339 | 0.000 |
| L7.cases_dengue_des  | 0.053466  | 0.044131 | 1.212  | 0.226 |
| L8.cases_zika        | 0.304054  | 0.214296 | 1.419  | 0.156 |
| L8.cases_des_zika    | 0.149818  | 0.755352 | 0.198  | 0.843 |
| L8.cases_chik        | 0.107014  | 0.158030 | 0.677  | 0.498 |
| L8.cases_des_chik    | -0.164668 | 0.443811 | -0.371 | 0.711 |
| L8.cases_dengue      | 0.051833  | 0.029626 | 1.750  | 0.080 |
| L8.cases_dengue_des  | -0.033110 | 0.047213 | -0.701 | 0.483 |
| L9.cases_zika        | 0.054633  | 0.209230 | 0.261  | 0.794 |
| L9.cases_des_zika    | -0.967618 | 0.764804 | -1.265 | 0.206 |
| L9.cases_chik        | 0.226059  | 0.156001 | 1.449  | 0.147 |
| L9.cases_des_chik    | -0.424262 | 0.452251 | -0.938 | 0.348 |
| L9.cases_dengue      | -0.025822 | 0.030130 | -0.857 | 0.391 |
| L9.cases_dengue_des  | 0.022919  | 0.049982 | 0.459  | 0.647 |
| L10.cases_zika       | -0.080753 | 0.202077 | -0.400 | 0.689 |
| L10.cases_des_zika   | -1.430709 | 0.727667 | -1.966 | 0.049 |
| L10.cases_chik       | -0.225482 | 0.163548 | -1.379 | 0.168 |
| L10.cases_des_chik   | 0.550342  | 0.442219 | 1.245  | 0.213 |
| L10.cases_dengue     | -0.036137 | 0.028367 | -1.274 | 0.203 |
| L10.cases_dengue_des | 0.098266  | 0.047316 | 2.077  | 0.038 |
| L11.cases_zika       | 0.628872  | 0.206281 | 3.049  | 0.002 |
| L11.cases_des_zika   | -1.458785 | 0.784026 | -1.861 | 0.063 |
| L11.cases_chik       | 0.078187  | 0.163313 | 0.479  | 0.632 |
| L11.cases_des_chik   | -0.397749 | 0.447309 | -0.889 | 0.374 |
| L11.cases_dengue     | -0.053401 | 0.027257 | -1.959 | 0.050 |
| L11.cases_dengue_des | 0.030319  | 0.045203 | 0.671  | 0.502 |
| L12.cases_zika       | -0.401798 | 0.208689 | -1.925 | 0.054 |
| L12.cases_des_zika   | 1.027986  | 0.840143 | 1.224  | 0.221 |
| L12.cases_chik       | -0.031798 | 0.151355 | -0.210 | 0.834 |
| L12.cases_des_chik   | 0.072964  | 0.412643 | 0.177  | 0.860 |
| L12.cases_dengue     | 0.035607  | 0.026831 | 1.327  | 0.184 |
| L12.cases_dengue_des | 0.044942  | 0.043858 | 1.025  | 0.306 |
| L13.cases_zika       | -0.197608 | 0.211541 | -0.934 | 0.350 |
| L13.cases_des_zika   | -0.200851 | 0.862065 | -0.233 | 0.816 |
| L13.cases_chik       | 0.064924  | 0.158917 | 0.409  | 0.683 |
| L13.cases_des_chik   | -0.071529 | 0.409352 | -0.175 | 0.861 |
| L13.cases_dengue     | -0.043492 | 0.026734 | -1.627 | 0.104 |
| L13.cases_dengue_des | 0.110564  | 0.034900 | 3.168  | 0.002 |

Results for equation cases\_des\_zika

|                   | coefficient | std. error | t-stat | prob  |
|-------------------|-------------|------------|--------|-------|
| const             | 3.500321    | 6.695504   | 0.523  | 0.601 |
| L1.cases_zika     | 0.153770    | 0.040023   | 3.842  | 0.000 |
| L1.cases_des_zika | 0.545798    | 0.173907   | 3.138  | 0.002 |
| L1.cases_chik     | -0.002482   | 0.035588   | -0.070 | 0.944 |
| L1.cases_des_chik | -0.016342   | 0.096693   | -0.169 | 0.866 |

|                     |           |          |        |       |
|---------------------|-----------|----------|--------|-------|
| L1.cases_dengue     | -0.000862 | 0.005048 | -0.171 | 0.864 |
| L1.cases_dengue_des | -0.058296 | 0.011709 | -4.979 | 0.000 |
| L2.cases_zika       | -0.098163 | 0.048394 | -2.028 | 0.043 |
| L2.cases_des_zika   | 0.195727  | 0.188590 | 1.038  | 0.299 |
| L2.cases_chik       | 0.055188  | 0.032795 | 1.683  | 0.092 |
| L2.cases_des_chik   | -0.063797 | 0.097925 | -0.651 | 0.515 |
| L2.cases_dengue     | 0.027516  | 0.006124 | 4.493  | 0.000 |
| L2.cases_dengue_des | -0.027617 | 0.013703 | -2.015 | 0.044 |
| L3.cases_zika       | -0.104338 | 0.054446 | -1.916 | 0.055 |
| L3.cases_des_zika   | 0.323224  | 0.181587 | 1.780  | 0.075 |
| L3.cases_chik       | -0.045744 | 0.038281 | -1.195 | 0.232 |
| L3.cases_des_chik   | 0.209283  | 0.105661 | 1.981  | 0.048 |
| L3.cases_dengue     | 0.002302  | 0.007439 | 0.309  | 0.757 |
| L3.cases_dengue_des | 0.002193  | 0.014791 | 0.148  | 0.882 |
| L4.cases_zika       | 0.041437  | 0.055731 | 0.744  | 0.457 |
| L4.cases_des_zika   | -0.143058 | 0.206656 | -0.692 | 0.489 |
| L4.cases_chik       | -0.067515 | 0.036390 | -1.855 | 0.064 |
| L4.cases_des_chik   | 0.045655  | 0.110210 | 0.414  | 0.679 |
| L4.cases_dengue     | -0.000892 | 0.006887 | -0.129 | 0.897 |
| L4.cases_dengue_des | 0.025749  | 0.014713 | 1.750  | 0.080 |
| L5.cases_zika       | 0.084788  | 0.049772 | 1.704  | 0.088 |
| L5.cases_des_zika   | -0.365668 | 0.195730 | -1.868 | 0.062 |
| L5.cases_chik       | -0.002845 | 0.036891 | -0.077 | 0.939 |
| L5.cases_des_chik   | -0.031000 | 0.109493 | -0.283 | 0.777 |
| L5.cases_dengue     | 0.002020  | 0.006946 | 0.291  | 0.771 |
| L5.cases_dengue_des | 0.016140  | 0.012518 | 1.289  | 0.197 |
| L6.cases_zika       | 0.035522  | 0.054187 | 0.656  | 0.512 |
| L6.cases_des_zika   | -0.221049 | 0.211614 | -1.045 | 0.296 |
| L6.cases_chik       | -0.007814 | 0.038358 | -0.204 | 0.839 |
| L6.cases_des_chik   | -0.052905 | 0.107011 | -0.494 | 0.621 |
| L6.cases_dengue     | 0.005391  | 0.005837 | 0.924  | 0.356 |
| L6.cases_dengue_des | 0.034974  | 0.011019 | 3.174  | 0.002 |
| L7.cases_zika       | -0.074749 | 0.050926 | -1.468 | 0.142 |
| L7.cases_des_zika   | 0.212385  | 0.198753 | 1.069  | 0.285 |
| L7.cases_chik       | 0.022033  | 0.040452 | 0.545  | 0.586 |
| L7.cases_des_chik   | -0.147372 | 0.106940 | -1.378 | 0.168 |
| L7.cases_dengue     | -0.026251 | 0.006329 | -4.148 | 0.000 |
| L7.cases_dengue_des | 0.024216  | 0.010506 | 2.305  | 0.021 |
| L8.cases_zika       | 0.048191  | 0.051017 | 0.945  | 0.345 |
| L8.cases_des_zika   | 0.060713  | 0.179827 | 0.338  | 0.736 |
| L8.cases_chik       | 0.022819  | 0.037622 | 0.607  | 0.544 |
| L8.cases_des_chik   | 0.050648  | 0.105658 | 0.479  | 0.632 |
| L8.cases_dengue     | 0.001218  | 0.007053 | 0.173  | 0.863 |
| L8.cases_dengue_des | -0.003618 | 0.011240 | -0.322 | 0.748 |
| L9.cases_zika       | 0.011073  | 0.049811 | 0.222  | 0.824 |
| L9.cases_des_zika   | -0.209837 | 0.182077 | -1.152 | 0.249 |
| L9.cases_chik       | 0.027751  | 0.037139 | 0.747  | 0.455 |
| L9.cases_des_chik   | -0.024009 | 0.107668 | -0.223 | 0.824 |
| L9.cases_dengue     | -0.005489 | 0.007173 | -0.765 | 0.444 |
| L9.cases_dengue_des | 0.003254  | 0.011899 | 0.273  | 0.785 |
| L10.cases_zika      | 0.064279  | 0.048109 | 1.336  | 0.182 |
| L10.cases_des_zika  | -0.590941 | 0.173236 | -3.411 | 0.001 |
| L10.cases_chik      | -0.016240 | 0.038936 | -0.417 | 0.677 |

|                      |           |          |        |       |
|----------------------|-----------|----------|--------|-------|
| L10.cases_des_chik   | 0.115992  | 0.105279 | 1.102  | 0.271 |
| L10.cases_dengue     | -0.009162 | 0.006753 | -1.357 | 0.175 |
| L10.cases_dengue_des | 0.017654  | 0.011265 | 1.567  | 0.117 |
| L11.cases_zika       | 0.186632  | 0.049109 | 3.800  | 0.000 |
| L11.cases_des_zika   | -0.662448 | 0.186653 | -3.549 | 0.000 |
| L11.cases_chik       | 0.009343  | 0.038880 | 0.240  | 0.810 |
| L11.cases_des_chik   | -0.042072 | 0.106491 | -0.395 | 0.693 |
| L11.cases_dengue     | -0.010161 | 0.006489 | -1.566 | 0.117 |
| L11.cases_dengue_des | 0.018022  | 0.010761 | 1.675  | 0.094 |
| L12.cases_zika       | -0.116973 | 0.049683 | -2.354 | 0.019 |
| L12.cases_des_zika   | 0.238299  | 0.200013 | 1.191  | 0.233 |
| L12.cases_chik       | -0.032113 | 0.036033 | -0.891 | 0.373 |
| L12.cases_des_chik   | 0.009633  | 0.098238 | 0.098  | 0.922 |
| L12.cases_dengue     | -0.004770 | 0.006388 | -0.747 | 0.455 |
| L12.cases_dengue_des | 0.022606  | 0.010441 | 2.165  | 0.030 |
| L13.cases_zika       | -0.002168 | 0.050362 | -0.043 | 0.966 |
| L13.cases_des_zika   | -0.070744 | 0.205232 | -0.345 | 0.730 |
| L13.cases_chik       | -0.009417 | 0.037833 | -0.249 | 0.803 |
| L13.cases_des_chik   | 0.106187  | 0.097454 | 1.090  | 0.276 |
| L13.cases_dengue     | -0.005714 | 0.006365 | -0.898 | 0.369 |
| L13.cases_dengue_des | 0.013796  | 0.008309 | 1.660  | 0.097 |

Results for equation cases\_chik

|                     | coefficient | std. error | t-stat | prob  |
|---------------------|-------------|------------|--------|-------|
| const               | -13.915982  | 27.337543  | -0.509 | 0.611 |
| L1.cases_zika       | -0.184642   | 0.163413   | -1.130 | 0.259 |
| L1.cases_des_zika   | 0.680923    | 0.710058   | 0.959  | 0.338 |
| L1.cases_chik       | -0.070040   | 0.145304   | -0.482 | 0.630 |
| L1.cases_des_chik   | -0.651946   | 0.394794   | -1.651 | 0.099 |
| L1.cases_dengue     | 0.000021    | 0.020611   | 0.001  | 0.999 |
| L1.cases_dengue_des | 0.051685    | 0.047806   | 1.081  | 0.280 |
| L2.cases_zika       | -0.074540   | 0.197590   | -0.377 | 0.706 |
| L2.cases_des_zika   | 1.260483    | 0.770006   | 1.637  | 0.102 |
| L2.cases_chik       | 0.712833    | 0.133901   | 5.324  | 0.000 |
| L2.cases_des_chik   | -1.693991   | 0.399825   | -4.237 | 0.000 |
| L2.cases_dengue     | -0.050748   | 0.025005   | -2.030 | 0.042 |
| L2.cases_dengue_des | 0.074683    | 0.055951   | 1.335  | 0.182 |
| L3.cases_zika       | -0.457288   | 0.222300   | -2.057 | 0.040 |
| L3.cases_des_zika   | 0.872903    | 0.741414   | 1.177  | 0.239 |
| L3.cases_chik       | 0.374834    | 0.156299   | 2.398  | 0.016 |
| L3.cases_des_chik   | -1.122729   | 0.431412   | -2.602 | 0.009 |
| L3.cases_dengue     | -0.009599   | 0.030375   | -0.316 | 0.752 |
| L3.cases_dengue_des | 0.117891    | 0.060393   | 1.952  | 0.051 |
| L4.cases_zika       | 0.180660    | 0.227549   | 0.794  | 0.427 |
| L4.cases_des_zika   | -1.596248   | 0.843770   | -1.892 | 0.059 |
| L4.cases_chik       | -0.134500   | 0.148577   | -0.905 | 0.365 |
| L4.cases_des_chik   | 0.969467    | 0.449985   | 2.154  | 0.031 |
| L4.cases_dengue     | -0.028074   | 0.028121   | -0.998 | 0.318 |
| L4.cases_dengue_des | 0.098683    | 0.060071   | 1.643  | 0.100 |
| L5.cases_zika       | -0.432976   | 0.203216   | -2.131 | 0.033 |

|                      |           |          |        |       |
|----------------------|-----------|----------|--------|-------|
| L5.cases_des_zika    | 0.181582  | 0.799161 | 0.227  | 0.820 |
| L5.cases_chik        | 0.090081  | 0.150624 | 0.598  | 0.550 |
| L5.cases_des_chik    | -0.761246 | 0.447056 | -1.703 | 0.089 |
| L5.cases_dengue      | -0.015916 | 0.028361 | -0.561 | 0.575 |
| L5.cases_dengue_des  | 0.121323  | 0.051111 | 2.374  | 0.018 |
| L6.cases_zika        | 0.207648  | 0.221246 | 0.939  | 0.348 |
| L6.cases_des_zika    | 0.245591  | 0.864013 | 0.284  | 0.776 |
| L6.cases_chik        | -0.436098 | 0.156616 | -2.785 | 0.005 |
| L6.cases_des_chik    | 0.605027  | 0.436923 | 1.385  | 0.166 |
| L6.cases_dengue      | -0.074590 | 0.023832 | -3.130 | 0.002 |
| L6.cases_dengue_des  | 0.103928  | 0.044992 | 2.310  | 0.021 |
| L7.cases_zika        | -0.364973 | 0.207931 | -1.755 | 0.079 |
| L7.cases_des_zika    | 0.416176  | 0.811503 | 0.513  | 0.608 |
| L7.cases_chik        | 0.247243  | 0.165165 | 1.497  | 0.134 |
| L7.cases_des_chik    | -0.358135 | 0.436632 | -0.820 | 0.412 |
| L7.cases_dengue      | -0.014547 | 0.025841 | -0.563 | 0.573 |
| L7.cases_dengue_des  | 0.096209  | 0.042897 | 2.243  | 0.025 |
| L8.cases_zika        | -0.103750 | 0.208303 | -0.498 | 0.618 |
| L8.cases_des_zika    | -0.667996 | 0.734227 | -0.910 | 0.363 |
| L8.cases_chik        | -0.269907 | 0.153610 | -1.757 | 0.079 |
| L8.cases_des_chik    | 1.534154  | 0.431399 | 3.556  | 0.000 |
| L8.cases_dengue      | -0.068830 | 0.028797 | -2.390 | 0.017 |
| L8.cases_dengue_des  | 0.164204  | 0.045893 | 3.578  | 0.000 |
| L9.cases_zika        | -0.001881 | 0.203378 | -0.009 | 0.993 |
| L9.cases_des_zika    | -0.436446 | 0.743415 | -0.587 | 0.557 |
| L9.cases_chik        | -0.214708 | 0.151638 | -1.416 | 0.157 |
| L9.cases_des_chik    | 0.915687  | 0.439603 | 2.083  | 0.037 |
| L9.cases_dengue      | -0.066114 | 0.029288 | -2.257 | 0.024 |
| L9.cases_dengue_des  | 0.115287  | 0.048584 | 2.373  | 0.018 |
| L10.cases_zika       | 0.150883  | 0.196426 | 0.768  | 0.442 |
| L10.cases_des_zika   | -0.380277 | 0.707316 | -0.538 | 0.591 |
| L10.cases_chik       | 0.098955  | 0.158974 | 0.622  | 0.534 |
| L10.cases_des_chik   | 0.897270  | 0.429851 | 2.087  | 0.037 |
| L10.cases_dengue     | -0.050719 | 0.027574 | -1.839 | 0.066 |
| L10.cases_dengue_des | 0.097272  | 0.045993 | 2.115  | 0.034 |
| L11.cases_zika       | -0.112929 | 0.200512 | -0.563 | 0.573 |
| L11.cases_des_zika   | -0.069715 | 0.762098 | -0.091 | 0.927 |
| L11.cases_chik       | 0.098362  | 0.158746 | 0.620  | 0.536 |
| L11.cases_des_chik   | -0.245954 | 0.434799 | -0.566 | 0.572 |
| L11.cases_dengue     | -0.038058 | 0.026494 | -1.436 | 0.151 |
| L11.cases_dengue_des | 0.129383  | 0.043939 | 2.945  | 0.003 |
| L12.cases_zika       | -0.306173 | 0.202853 | -1.509 | 0.131 |
| L12.cases_des_zika   | 0.752396  | 0.816646 | 0.921  | 0.357 |
| L12.cases_chik       | -0.419601 | 0.147122 | -2.852 | 0.004 |
| L12.cases_des_chik   | 0.833122  | 0.401102 | 2.077  | 0.038 |
| L12.cases_dengue     | -0.075604 | 0.026081 | -2.899 | 0.004 |
| L12.cases_dengue_des | 0.092518  | 0.042632 | 2.170  | 0.030 |
| L13.cases_zika       | 0.114706  | 0.205625 | 0.558  | 0.577 |
| L13.cases_des_zika   | -0.213096 | 0.837955 | -0.254 | 0.799 |
| L13.cases_chik       | -0.236499 | 0.154472 | -1.531 | 0.126 |
| L13.cases_des_chik   | 0.575234  | 0.397904 | 1.446  | 0.148 |
| L13.cases_dengue     | -0.010782 | 0.025987 | -0.415 | 0.678 |
| L13.cases_dengue_des | 0.023736  | 0.033924 | 0.700  | 0.484 |

Results for equation cases\_des\_chik

|                     | coefficient | std. error | t-stat | prob  |
|---------------------|-------------|------------|--------|-------|
| const               | 1.283177    | 11.173407  | 0.115  | 0.909 |
| L1.cases_zika       | -0.035587   | 0.066790   | -0.533 | 0.594 |
| L1.cases_des_zika   | 0.381725    | 0.290215   | 1.315  | 0.188 |
| L1.cases_chik       | -0.063587   | 0.059389   | -1.071 | 0.284 |
| L1.cases_des_chik   | -0.042706   | 0.161360   | -0.265 | 0.791 |
| L1.cases_dengue     | 0.005938    | 0.008424   | 0.705  | 0.481 |
| L1.cases_dengue_des | -0.015892   | 0.019539   | -0.813 | 0.416 |
| L2.cases_zika       | -0.094376   | 0.080759   | -1.169 | 0.243 |
| L2.cases_des_zika   | 0.244900    | 0.314717   | 0.778  | 0.436 |
| L2.cases_chik       | 0.105473    | 0.054728   | 1.927  | 0.054 |
| L2.cases_des_chik   | -0.266636   | 0.163417   | -1.632 | 0.103 |
| L2.cases_dengue     | -0.003935   | 0.010220   | -0.385 | 0.700 |
| L2.cases_dengue_des | -0.001426   | 0.022868   | -0.062 | 0.950 |
| L3.cases_zika       | -0.125927   | 0.090859   | -1.386 | 0.166 |
| L3.cases_des_zika   | 0.880798    | 0.303031   | 2.907  | 0.004 |
| L3.cases_chik       | 0.002108    | 0.063882   | 0.033  | 0.974 |
| L3.cases_des_chik   | -0.468757   | 0.176327   | -2.658 | 0.008 |
| L3.cases_dengue     | 0.000310    | 0.012415   | 0.025  | 0.980 |
| L3.cases_dengue_des | 0.014819    | 0.024684   | 0.600  | 0.548 |
| L4.cases_zika       | 0.035549    | 0.093004   | 0.382  | 0.702 |
| L4.cases_des_zika   | -0.268716   | 0.344866   | -0.779 | 0.436 |
| L4.cases_chik       | -0.016094   | 0.060727   | -0.265 | 0.791 |
| L4.cases_des_chik   | -0.063439   | 0.183918   | -0.345 | 0.730 |
| L4.cases_dengue     | -0.003803   | 0.011493   | -0.331 | 0.741 |
| L4.cases_dengue_des | 0.039624    | 0.024552   | 1.614  | 0.107 |
| L5.cases_zika       | -0.136398   | 0.083059   | -1.642 | 0.101 |
| L5.cases_des_zika   | -0.495480   | 0.326633   | -1.517 | 0.129 |
| L5.cases_chik       | 0.193498    | 0.061563   | 3.143  | 0.002 |
| L5.cases_des_chik   | -0.398090   | 0.182721   | -2.179 | 0.029 |
| L5.cases_dengue     | 0.000434    | 0.011592   | 0.037  | 0.970 |
| L5.cases_dengue_des | 0.071603    | 0.020890   | 3.428  | 0.001 |
| L6.cases_zika       | 0.090106    | 0.090428   | 0.996  | 0.319 |
| L6.cases_des_zika   | 0.006465    | 0.353140   | 0.018  | 0.985 |
| L6.cases_chik       | -0.041019   | 0.064012   | -0.641 | 0.522 |
| L6.cases_des_chik   | -0.000499   | 0.178579   | -0.003 | 0.998 |
| L6.cases_dengue     | -0.038489   | 0.009741   | -3.951 | 0.000 |
| L6.cases_dengue_des | 0.053060    | 0.018389   | 2.885  | 0.004 |
| L7.cases_zika       | -0.018830   | 0.084985   | -0.222 | 0.825 |
| L7.cases_des_zika   | 0.003748    | 0.331678   | 0.011  | 0.991 |
| L7.cases_chik       | 0.069117    | 0.067506   | 1.024  | 0.306 |
| L7.cases_des_chik   | -0.130023   | 0.178460   | -0.729 | 0.466 |
| L7.cases_dengue     | -0.007088   | 0.010562   | -0.671 | 0.502 |
| L7.cases_dengue_des | 0.012797    | 0.017533   | 0.730  | 0.465 |
| L8.cases_zika       | -0.046181   | 0.085137   | -0.542 | 0.588 |
| L8.cases_des_zika   | 0.101719    | 0.300094   | 0.339  | 0.735 |
| L8.cases_chik       | -0.005318   | 0.062784   | -0.085 | 0.932 |
| L8.cases_des_chik   | 0.366547    | 0.176322   | 2.079  | 0.038 |

|                      |           |          |        |       |
|----------------------|-----------|----------|--------|-------|
| L8.cases_dengue      | -0.007598 | 0.011770 | -0.646 | 0.519 |
| L8.cases_dengue_des  | 0.032905  | 0.018757 | 1.754  | 0.079 |
| L9.cases_zika        | -0.087432 | 0.083125 | -1.052 | 0.293 |
| L9.cases_des_zika    | -0.114796 | 0.303849 | -0.378 | 0.706 |
| L9.cases_chik        | -0.067650 | 0.061978 | -1.092 | 0.275 |
| L9.cases_des_chik    | 0.267229  | 0.179675 | 1.487  | 0.137 |
| L9.cases_dengue      | -0.028796 | 0.011970 | -2.406 | 0.016 |
| L9.cases_dengue_des  | 0.048682  | 0.019857 | 2.452  | 0.014 |
| L10.cases_zika       | 0.009379  | 0.080283 | 0.117  | 0.907 |
| L10.cases_des_zika   | -0.017948 | 0.289095 | -0.062 | 0.950 |
| L10.cases_chik       | -0.079265 | 0.064976 | -1.220 | 0.222 |
| L10.cases_des_chik   | 0.182226  | 0.175689 | 1.037  | 0.300 |
| L10.cases_dengue     | -0.024145 | 0.011270 | -2.142 | 0.032 |
| L10.cases_dengue_des | 0.031336  | 0.018798 | 1.667  | 0.096 |
| L11.cases_zika       | 0.125035  | 0.081953 | 1.526  | 0.127 |
| L11.cases_des_zika   | -0.517683 | 0.311485 | -1.662 | 0.097 |
| L11.cases_chik       | 0.004791  | 0.064883 | 0.074  | 0.941 |
| L11.cases_des_chik   | 0.050466  | 0.177711 | 0.284  | 0.776 |
| L11.cases_dengue     | -0.003391 | 0.010829 | -0.313 | 0.754 |
| L11.cases_dengue_des | 0.039186  | 0.017959 | 2.182  | 0.029 |
| L12.cases_zika       | -0.086502 | 0.082910 | -1.043 | 0.297 |
| L12.cases_des_zika   | 0.084077  | 0.333780 | 0.252  | 0.801 |
| L12.cases_chik       | -0.039633 | 0.060132 | -0.659 | 0.510 |
| L12.cases_des_chik   | 0.140431  | 0.163939 | 0.857  | 0.392 |
| L12.cases_dengue     | -0.025657 | 0.010660 | -2.407 | 0.016 |
| L12.cases_dengue_des | 0.039357  | 0.017424 | 2.259  | 0.024 |
| L13.cases_zika       | -0.005186 | 0.084043 | -0.062 | 0.951 |
| L13.cases_des_zika   | 0.213569  | 0.342489 | 0.624  | 0.533 |
| L13.cases_chik       | -0.035577 | 0.063136 | -0.564 | 0.573 |
| L13.cases_des_chik   | 0.090083  | 0.162631 | 0.554  | 0.580 |
| L13.cases_dengue     | -0.002852 | 0.010621 | -0.269 | 0.788 |
| L13.cases_dengue_des | 0.005171  | 0.013865 | 0.373  | 0.709 |

Results for equation cases\_dengue

|                     | coefficient | std. error | t-stat | prob  |
|---------------------|-------------|------------|--------|-------|
| const               | -160.671309 | 190.319635 | -0.844 | 0.399 |
| L1.cases_zika       | -0.446867   | 1.137659   | -0.393 | 0.694 |
| L1.cases_des_zika   | 17.070065   | 4.943314   | 3.453  | 0.001 |
| L1.cases_chik       | 0.395457    | 1.011584   | 0.391  | 0.696 |
| L1.cases_des_chik   | -2.921603   | 2.748492   | -1.063 | 0.288 |
| L1.cases_dengue     | 0.016670    | 0.143491   | 0.116  | 0.908 |
| L1.cases_dengue_des | -0.673699   | 0.332818   | -2.024 | 0.043 |
| L2.cases_zika       | -0.585493   | 1.375590   | -0.426 | 0.670 |
| L2.cases_des_zika   | -5.631557   | 5.360661   | -1.051 | 0.293 |
| L2.cases_chik       | -0.412694   | 0.932197   | -0.443 | 0.658 |
| L2.cases_des_chik   | 2.864799    | 2.783518   | 1.029  | 0.303 |
| L2.cases_dengue     | 0.887117    | 0.174081   | 5.096  | 0.000 |
| L2.cases_dengue_des | -0.571866   | 0.389521   | -1.468 | 0.142 |
| L3.cases_zika       | -6.004440   | 1.547621   | -3.880 | 0.000 |
| L3.cases_des_zika   | 13.362043   | 5.161604   | 2.589  | 0.010 |

|                      |            |          |        |       |
|----------------------|------------|----------|--------|-------|
| L3.cases_chik        | -1.186516  | 1.088126 | -1.090 | 0.276 |
| L3.cases_des_chik    | -0.487387  | 3.003420 | -0.162 | 0.871 |
| L3.cases_dengue      | 0.308792   | 0.211466 | 1.460  | 0.144 |
| L3.cases_dengue_des  | 0.490396   | 0.420446 | 1.166  | 0.243 |
| L4.cases_zika        | 0.298268   | 1.584157 | 0.188  | 0.851 |
| L4.cases_des_zika    | 3.009798   | 5.874192 | 0.512  | 0.608 |
| L4.cases_chik        | -0.426530  | 1.034371 | -0.412 | 0.680 |
| L4.cases_des_chik    | 0.098009   | 3.132727 | 0.031  | 0.975 |
| L4.cases_dengue      | -0.170064  | 0.195771 | -0.869 | 0.385 |
| L4.cases_dengue_des  | 0.585632   | 0.418203 | 1.400  | 0.161 |
| L5.cases_zika        | 3.951725   | 1.414760 | 2.793  | 0.005 |
| L5.cases_des_zika    | -13.656467 | 5.563630 | -2.455 | 0.014 |
| L5.cases_chik        | 1.583714   | 1.048621 | 1.510  | 0.131 |
| L5.cases_des_chik    | -4.127235  | 3.112334 | -1.326 | 0.185 |
| L5.cases_dengue      | -0.043430  | 0.197442 | -0.220 | 0.826 |
| L5.cases_dengue_des  | 0.446266   | 0.355828 | 1.254  | 0.210 |
| L6.cases_zika        | 0.447195   | 1.540278 | 0.290  | 0.772 |
| L6.cases_des_zika    | -5.129775  | 6.015122 | -0.853 | 0.394 |
| L6.cases_chik        | -0.008736  | 1.090334 | -0.008 | 0.994 |
| L6.cases_des_chik    | 1.313012   | 3.041789 | 0.432  | 0.666 |
| L6.cases_dengue      | 0.058863   | 0.165918 | 0.355  | 0.723 |
| L6.cases_dengue_des  | 0.444011   | 0.313226 | 1.418  | 0.156 |
| L7.cases_zika        | -1.817495  | 1.447579 | -1.256 | 0.209 |
| L7.cases_des_zika    | 4.443436   | 5.649558 | 0.787  | 0.432 |
| L7.cases_chik        | -0.113654  | 1.149852 | -0.099 | 0.921 |
| L7.cases_des_chik    | -1.348182  | 3.039760 | -0.444 | 0.657 |
| L7.cases_dengue      | -0.316527  | 0.179903 | -1.759 | 0.079 |
| L7.cases_dengue_des  | -0.318393  | 0.298639 | -1.066 | 0.286 |
| L8.cases_zika        | -0.528749  | 1.450170 | -0.365 | 0.715 |
| L8.cases_des_zika    | 12.391995  | 5.111574 | 2.424  | 0.015 |
| L8.cases_chik        | 0.085895   | 1.069411 | 0.080  | 0.936 |
| L8.cases_des_chik    | -0.622599  | 3.003333 | -0.207 | 0.836 |
| L8.cases_dengue      | 0.268022   | 0.200480 | 1.337  | 0.181 |
| L8.cases_dengue_des  | -0.660131  | 0.319498 | -2.066 | 0.039 |
| L9.cases_zika        | -0.333280  | 1.415886 | -0.235 | 0.814 |
| L9.cases_des_zika    | 0.307700   | 5.175534 | 0.059  | 0.953 |
| L9.cases_chik        | 0.356858   | 1.055681 | 0.338  | 0.735 |
| L9.cases_des_chik    | 0.542103   | 3.060448 | 0.177  | 0.859 |
| L9.cases_dengue      | -0.186561  | 0.203895 | -0.915 | 0.360 |
| L9.cases_dengue_des  | -0.236778  | 0.338235 | -0.700 | 0.484 |
| L10.cases_zika       | -0.408625  | 1.367484 | -0.299 | 0.765 |
| L10.cases_des_zika   | 0.467138   | 4.924224 | 0.095  | 0.924 |
| L10.cases_chik       | -0.388443  | 1.106751 | -0.351 | 0.726 |
| L10.cases_des_chik   | 0.715099   | 2.992557 | 0.239  | 0.811 |
| L10.cases_dengue     | -0.244566  | 0.191965 | -1.274 | 0.203 |
| L10.cases_dengue_des | -0.004361  | 0.320193 | -0.014 | 0.989 |
| L11.cases_zika       | 2.647472   | 1.395934 | 1.897  | 0.058 |
| L11.cases_des_zika   | -15.606905 | 5.305609 | -2.942 | 0.003 |
| L11.cases_chik       | -1.134750  | 1.105162 | -1.027 | 0.305 |
| L11.cases_des_chik   | 2.730199   | 3.027003 | 0.902  | 0.367 |
| L11.cases_dengue     | -0.141452  | 0.184450 | -0.767 | 0.443 |
| L11.cases_dengue_des | 0.538952   | 0.305895 | 1.762  | 0.078 |
| L12.cases_zika       | -4.326466  | 1.412230 | -3.064 | 0.002 |



|                      |           |          |        |       |
|----------------------|-----------|----------|--------|-------|
| L12.cases_des_zika   | 17.269488 | 5.685362 | 3.038  | 0.002 |
| L12.cases_chik       | 0.221794  | 1.024242 | 0.217  | 0.829 |
| L12.cases_des_chik   | -2.929602 | 2.792410 | -1.049 | 0.294 |
| L12.cases_dengue     | -0.142483 | 0.181570 | -0.785 | 0.433 |
| L12.cases_dengue_des | 0.354326  | 0.296796 | 1.194  | 0.233 |
| L13.cases_zika       | -1.819899 | 1.431527 | -1.271 | 0.204 |
| L13.cases_des_zika   | 4.667516  | 5.833712 | 0.800  | 0.424 |
| L13.cases_chik       | 0.408421  | 1.075411 | 0.380  | 0.704 |
| L13.cases_des_chik   | -1.187314 | 2.770142 | -0.429 | 0.668 |
| L13.cases_dengue     | 0.094118  | 0.180914 | 0.520  | 0.603 |
| L13.cases_dengue_des | 0.495132  | 0.236171 | 2.096  | 0.036 |

Results for equation cases\_dengue\_des

|                     | coefficient | std. error | t-stat | prob  |
|---------------------|-------------|------------|--------|-------|
| const               | -46.353323  | 98.349311  | -0.471 | 0.637 |
| L1.cases_zika       | 0.177450    | 0.587895   | 0.302  | 0.763 |
| L1.cases_des_zika   | 2.444867    | 2.554500   | 0.957  | 0.339 |
| L1.cases_chik       | 0.107638    | 0.522745   | 0.206  | 0.837 |
| L1.cases_des_chik   | 1.639880    | 1.420307   | 1.155  | 0.248 |
| L1.cases_dengue     | 0.250785    | 0.074150   | 3.382  | 0.001 |
| L1.cases_dengue_des | -0.692674   | 0.171987   | -4.027 | 0.000 |
| L2.cases_zika       | 1.725036    | 0.710848   | 2.427  | 0.015 |
| L2.cases_des_zika   | -0.054749   | 2.770168   | -0.020 | 0.984 |
| L2.cases_chik       | -0.568567   | 0.481721   | -1.180 | 0.238 |
| L2.cases_des_chik   | 1.667821    | 1.438407   | 1.159  | 0.246 |
| L2.cases_dengue     | 0.273475    | 0.089958   | 3.040  | 0.002 |
| L2.cases_dengue_des | -0.745366   | 0.201288   | -3.703 | 0.000 |
| L3.cases_zika       | -3.770326   | 0.799746   | -4.714 | 0.000 |
| L3.cases_des_zika   | 10.966172   | 2.667304   | 4.111  | 0.000 |
| L3.cases_chik       | -0.285550   | 0.562299   | -0.508 | 0.612 |
| L3.cases_des_chik   | 0.085305    | 1.552043   | 0.055  | 0.956 |
| L3.cases_dengue     | 0.209278    | 0.109277   | 1.915  | 0.055 |
| L3.cases_dengue_des | 0.049734    | 0.217269   | 0.229  | 0.819 |
| L4.cases_zika       | 0.992174    | 0.818627   | 1.212  | 0.226 |
| L4.cases_des_zika   | -0.894029   | 3.035540   | -0.295 | 0.768 |
| L4.cases_chik       | -0.026598   | 0.534520   | -0.050 | 0.960 |
| L4.cases_des_chik   | 0.976526    | 1.618863   | 0.603  | 0.546 |
| L4.cases_dengue     | 0.087443    | 0.101166   | 0.864  | 0.387 |
| L4.cases_dengue_des | 0.177211    | 0.216110   | 0.820  | 0.412 |
| L5.cases_zika       | -0.232007   | 0.731089   | -0.317 | 0.751 |
| L5.cases_des_zika   | -6.327113   | 2.875054   | -2.201 | 0.028 |
| L5.cases_chik       | 0.050366    | 0.541884   | 0.093  | 0.926 |
| L5.cases_des_chik   | -0.541035   | 1.608326   | -0.336 | 0.737 |
| L5.cases_dengue     | 0.039690    | 0.102030   | 0.389  | 0.697 |
| L5.cases_dengue_des | 0.219223    | 0.183877   | 1.192  | 0.233 |
| L6.cases_zika       | 1.340859    | 0.795952   | 1.685  | 0.092 |
| L6.cases_des_zika   | -0.994711   | 3.108366   | -0.320 | 0.749 |
| L6.cases_chik       | -0.939093   | 0.563440   | -1.667 | 0.096 |
| L6.cases_des_chik   | 2.636285    | 1.571871   | 1.677  | 0.094 |
| L6.cases_dengue     | 0.014518    | 0.085740   | 0.169  | 0.866 |

|                      |            |          |        |       |
|----------------------|------------|----------|--------|-------|
| L6.cases_dengue_des  | 0.136015   | 0.161862 | 0.840  | 0.401 |
| L7.cases_zika        | -0.764867  | 0.748049 | -1.022 | 0.307 |
| L7.cases_des_zika    | 4.145726   | 2.919458 | 1.420  | 0.156 |
| L7.cases_chik        | 0.191633   | 0.594196 | 0.323  | 0.747 |
| L7.cases_des_chik    | -2.489073  | 1.570822 | -1.585 | 0.113 |
| L7.cases_dengue      | -0.051599  | 0.092967 | -0.555 | 0.579 |
| L7.cases_dengue_des  | -0.089853  | 0.154324 | -0.582 | 0.560 |
| L8.cases_zika        | -0.090293  | 0.749388 | -0.120 | 0.904 |
| L8.cases_des_zika    | 5.617012   | 2.641450 | 2.126  | 0.033 |
| L8.cases_chik        | -0.329741  | 0.552627 | -0.597 | 0.551 |
| L8.cases_des_chik    | 1.354375   | 1.551998 | 0.873  | 0.383 |
| L8.cases_dengue      | -0.035550  | 0.103600 | -0.343 | 0.731 |
| L8.cases_dengue_des  | -0.166102  | 0.165103 | -1.006 | 0.314 |
| L9.cases_zika        | -0.976949  | 0.731671 | -1.335 | 0.182 |
| L9.cases_des_zika    | -1.514698  | 2.674502 | -0.566 | 0.571 |
| L9.cases_chik        | 0.959388   | 0.545532 | 1.759  | 0.079 |
| L9.cases_des_chik    | -0.888185  | 1.581513 | -0.562 | 0.574 |
| L9.cases_dengue      | 0.022566   | 0.105364 | 0.214  | 0.830 |
| L9.cases_dengue_des  | 0.086052   | 0.174786 | 0.492  | 0.622 |
| L10.cases_zika       | -0.764555  | 0.706659 | -1.082 | 0.279 |
| L10.cases_des_zika   | 0.532113   | 2.544635 | 0.209  | 0.834 |
| L10.cases_chik       | -0.432713  | 0.571923 | -0.757 | 0.449 |
| L10.cases_des_chik   | 1.046211   | 1.546430 | 0.677  | 0.499 |
| L10.cases_dengue     | -0.122769  | 0.099200 | -1.238 | 0.216 |
| L10.cases_dengue_des | -0.032263  | 0.165463 | -0.195 | 0.845 |
| L11.cases_zika       | 2.179960   | 0.721361 | 3.022  | 0.003 |
| L11.cases_des_zika   | -10.306922 | 2.741719 | -3.759 | 0.000 |
| L11.cases_chik       | -0.429197  | 0.571102 | -0.752 | 0.452 |
| L11.cases_des_chik   | 1.078881   | 1.564230 | 0.690  | 0.490 |
| L11.cases_dengue     | -0.004526  | 0.095316 | -0.047 | 0.962 |
| L11.cases_dengue_des | 0.194530   | 0.158074 | 1.231  | 0.218 |
| L12.cases_zika       | -1.665553  | 0.729782 | -2.282 | 0.022 |
| L12.cases_des_zika   | 8.374264   | 2.937960 | 2.850  | 0.004 |
| L12.cases_chik       | -0.065857  | 0.529286 | -0.124 | 0.901 |
| L12.cases_des_chik   | -0.944793  | 1.443002 | -0.655 | 0.513 |
| L12.cases_dengue     | -0.099250  | 0.093828 | -1.058 | 0.290 |
| L12.cases_dengue_des | 0.086088   | 0.153372 | 0.561  | 0.575 |
| L13.cases_zika       | -1.138808  | 0.739754 | -1.539 | 0.124 |
| L13.cases_des_zika   | 1.008716   | 3.014621 | 0.335  | 0.738 |
| L13.cases_chik       | -0.396625  | 0.555728 | -0.714 | 0.475 |
| L13.cases_des_chik   | 0.241946   | 1.431495 | 0.169  | 0.866 |
| L13.cases_dengue     | -0.029184  | 0.093489 | -0.312 | 0.755 |
| L13.cases_dengue_des | 0.277434   | 0.122044 | 2.273  | 0.023 |

=====
